# Supplementary material
Source: MDPI journal article supplement (https://www.mdpi.com/2311-7524/9/12/1313)
Supplement: s1 [file s1]

Supplementary materials:

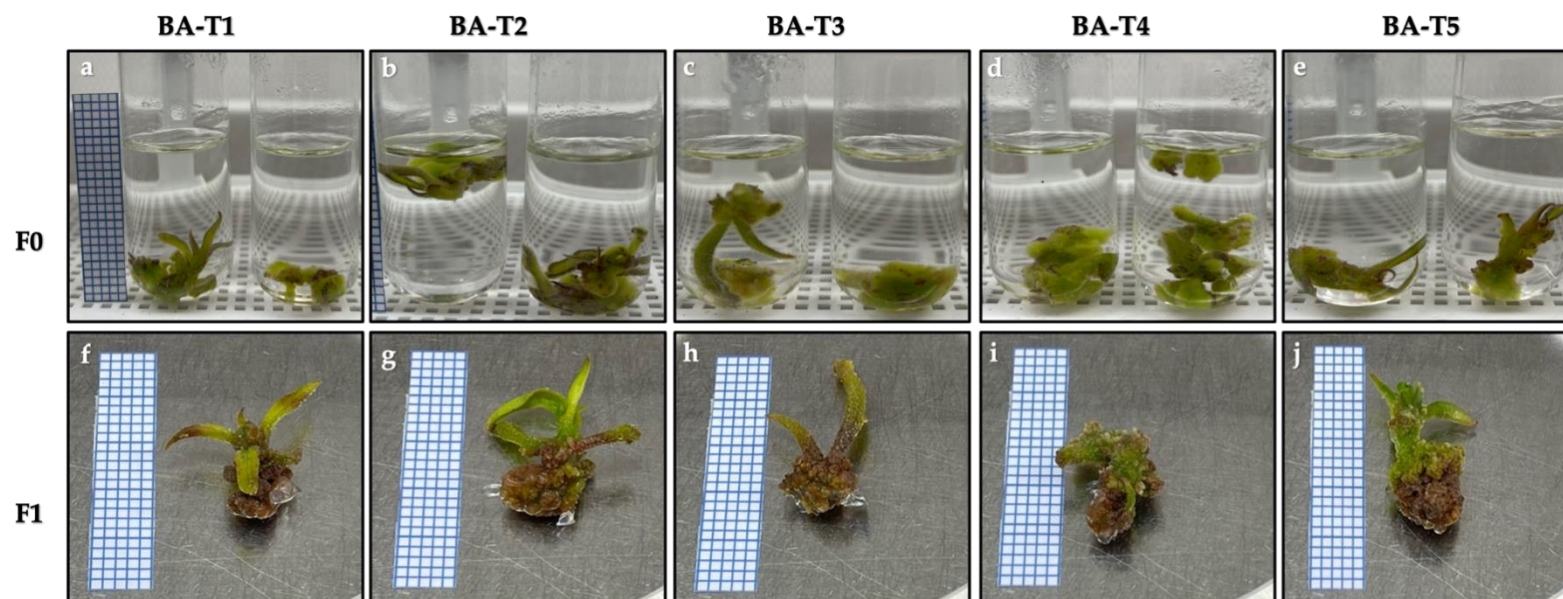

**Figure S1.** Meristem culture induction and multiplication of *D. hopwoodii* under different BA ( $1\text{--}15\text{ mgL}^{-1}$ ) concentrations. (a–e) Meristems treated with different concentrations of BA in 1/2 liquid WPM at the end of F0 (a), BA-T1, (b) BA-T2, (c) BA-T3, (d) BA-T4, (e) BA-T5; (f–j) Multiplication of meristem regenerated shoots on MSK2C medium at the end of F1, showing necrosis, browning, callusing and abnormal growth (f) BA-T1 (g) BA-T2 (h) BA-T3 (i) BA-T4 (j) BA-T5.

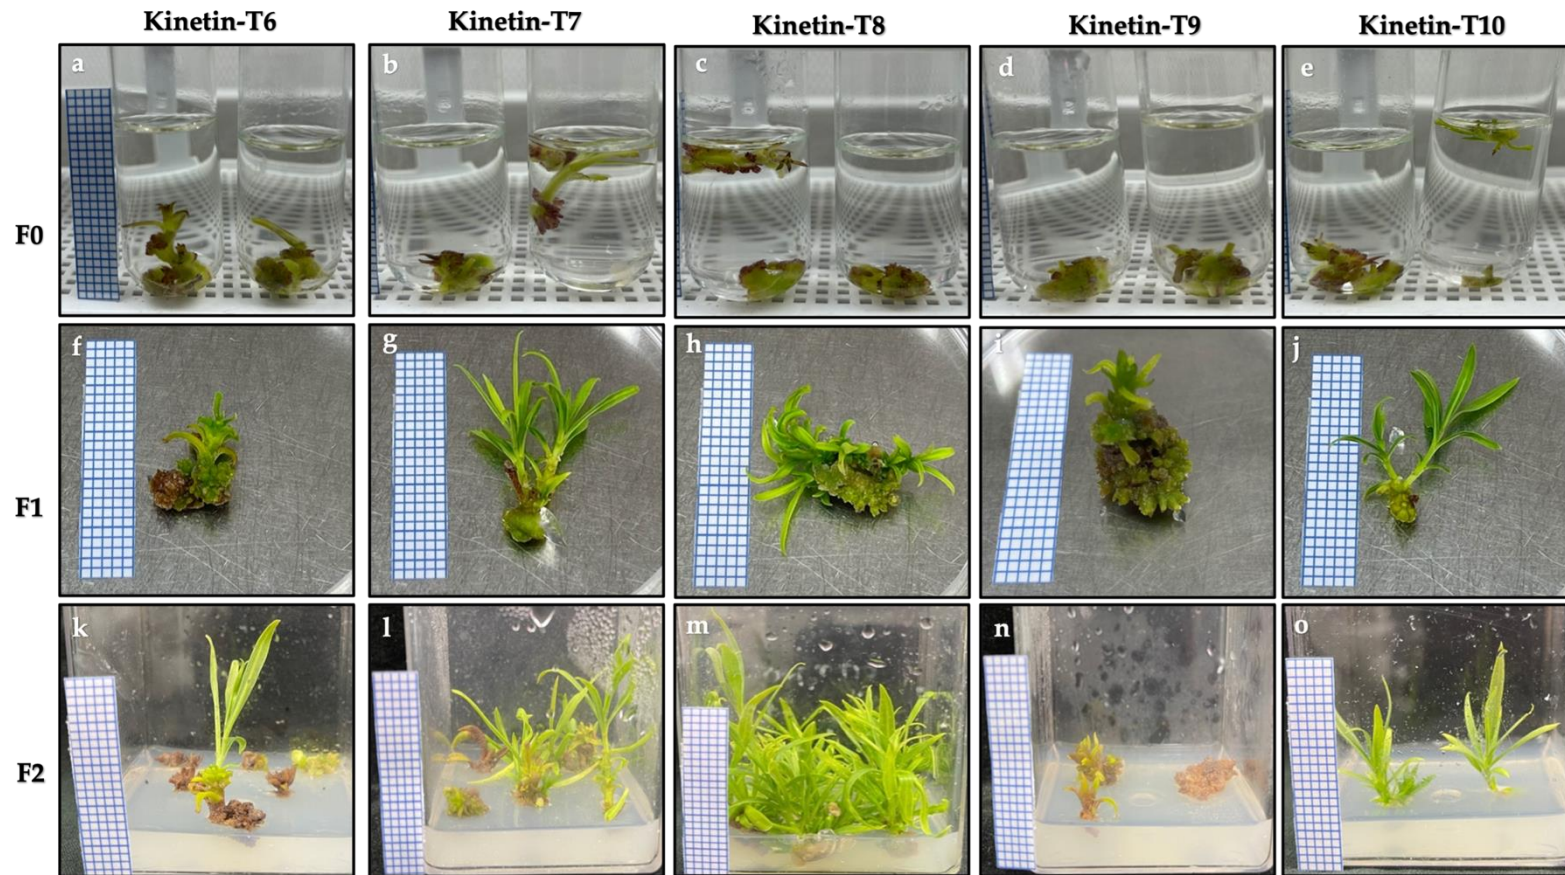

**Figure S2.** Meristem culture induction and multiplication of *D. hopwoodii* under different kinetin (1-10 mgL<sup>-1</sup>) concentrations: (a-e) Meristems treated with different concentrations of kinetin in 1/2 liquid WPM at the end of F0 (a) Kinetin-T6, (b) Kinetin-T7, (c) Kinetin-T8, (d) Kinetin-T9, (e) Kinetin-T10; (f-j) Multiplication of meristem regenerated shoots in MSK2C medium at the end of F1, showing shoot proliferation capacity associated with different kinetin concentrations initially used (f) Kinetin-T6, (g) Kinetin-T7, (h) Kinetin-T8, (i) Kinetin-T9, (j) Kinetin-T10; (k-o) Multiplication of meristem regenerated shoots in MSK2C medium at the end of F2, indicating multiplication capacity associated with different Kinetin concentrations initially used (k) Kinetin-T6, (l) Kinetin-T7, (m) Kinetin-T8, (n) Kinetin-T9, (o) Kinetin-T10.

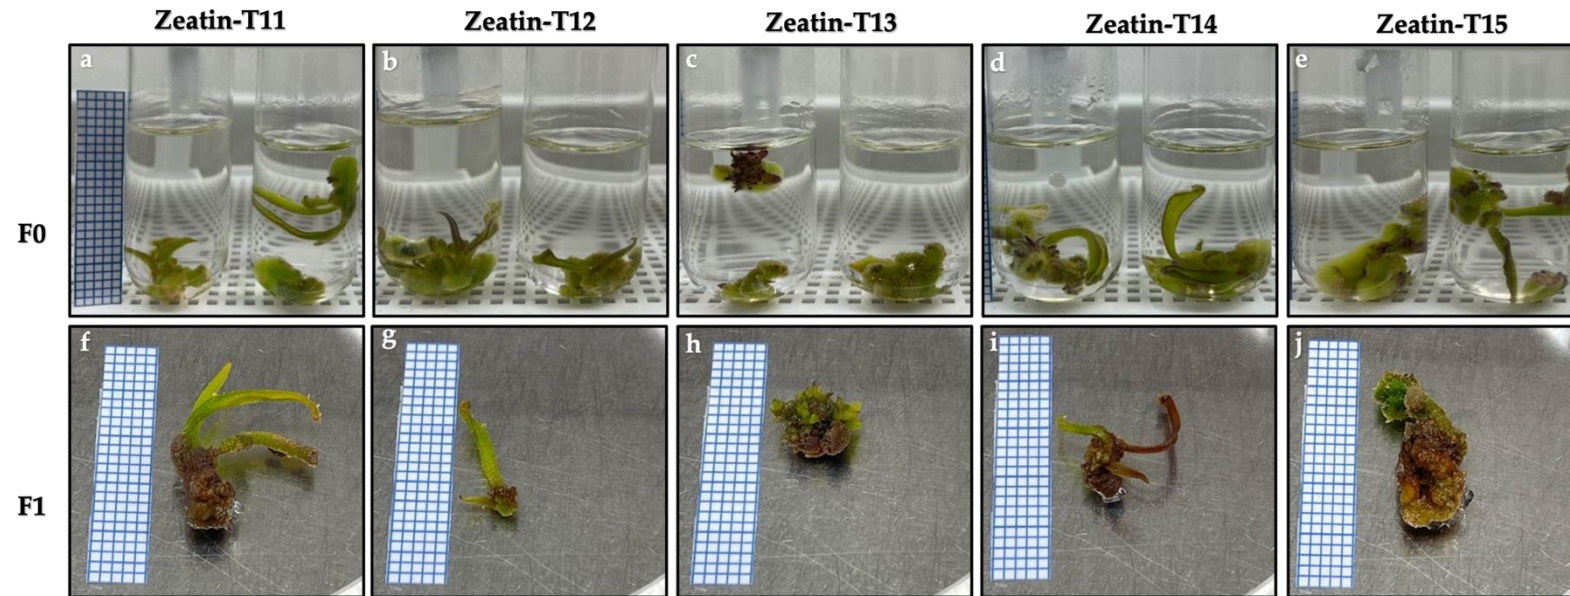

**Figure S3.** Meristem culture induction and multiplication of *D. hopwoodii* under different zeatin ( $1-10 \text{ mgL}^{-1}$ ) concentrations: (a-e) Meristems treated with different concentrations of zeatin in 1/2 liquid WPM at the end of F0 (a) Zeatin-T11, (b) Zeatin-T12, (c) Zeatin-T13, (d) Zeatin-T14, (e) Zeatin-T15; (f-j) Multiplication of meristem regenerated shoots in MSK2C medium at the end of F1, showing necrosis, browning, callusing and abnormal growth, (f) Zeatin-T11, (g) Zeatin-T12, (h) Zeatin-T13, (i) Zeatin-T14, (j) Zeatin-T15.



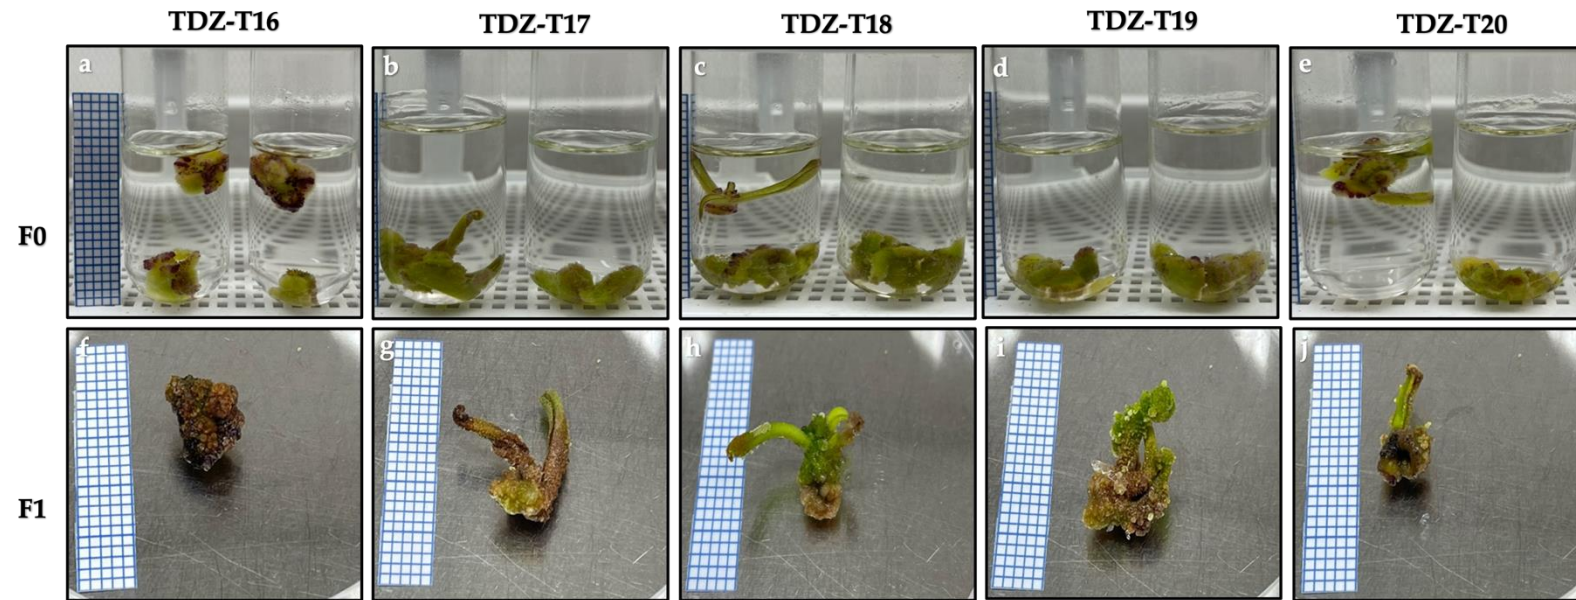

**Figure S4.** Meristem culture induction and multiplication of *D. hopwoodii* under different TDZ ( $0.05\text{--}0.5\text{ mgL}^{-1}$ ) concentrations: (a–e) Meristems treated with different concentrations of TDZ in 1/2 liquid WPM at the end of F0 (a) TDZ-T16, (b) TDZ-T17, (c) TDZ-T18, (d) TDZ-T19, (e) TDZ-T20; (f–j) Multiplication of meristem regenerated shoots in MSK2C medium at the end of F1, showing necrosis, browning, callusing and abnormal growth (f) TDZ-T16, (g) TDZ-T17, (h) TDZ-T18, (i) TDZ-T19, (j) TDZ-T20.

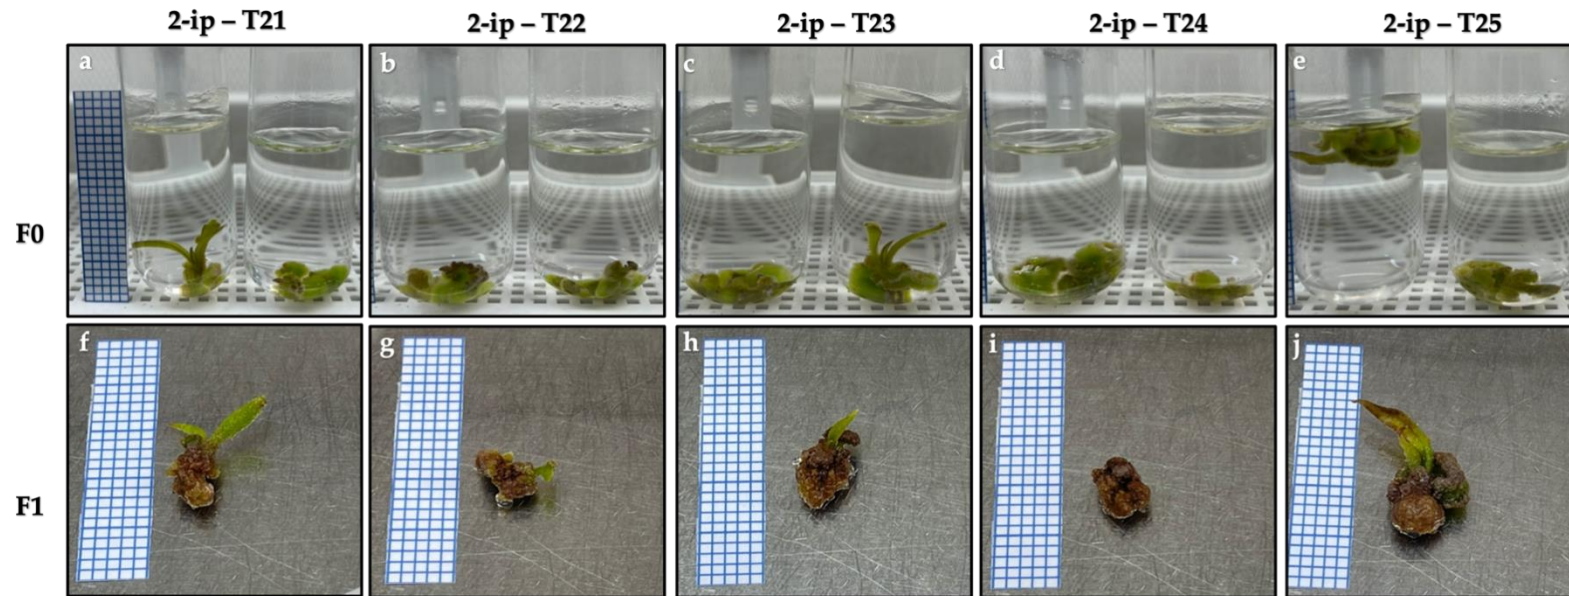

**Figure S5.** Meristem culture induction and multiplication of *D. hopwoodii* under different 2iP (0.1-1 mgL<sup>-1</sup>) concentrations: (a-e) Meristems treated with different concentrations of 2iP in 1/2 liquid WPM at the end of F0 (a) 2iP - T21, (b) 2iP - T22, (c) 2iP - T23, (d) 2iP - T24, (e) 2iP - T25; (f-j) Multiplication of meristem regenerated shoots in MSK2C medium at the end of F1, showing necrosis, browning, callusing and abnormal growth (f) 2iP - T21, (g) 2iP - T22, (h) 2iP - T23, (i) 2iP - T24, (j) 2iP - T25.
